# Supplementary material for: Pannexin 1 Transgenic Mice: Human Diseases and Sleep-Wake Function Revision
Source: MDPI journal article supplement (doi:10.3390/ijms22105269), 2021-05-17
Supplement: s1 [file s1]

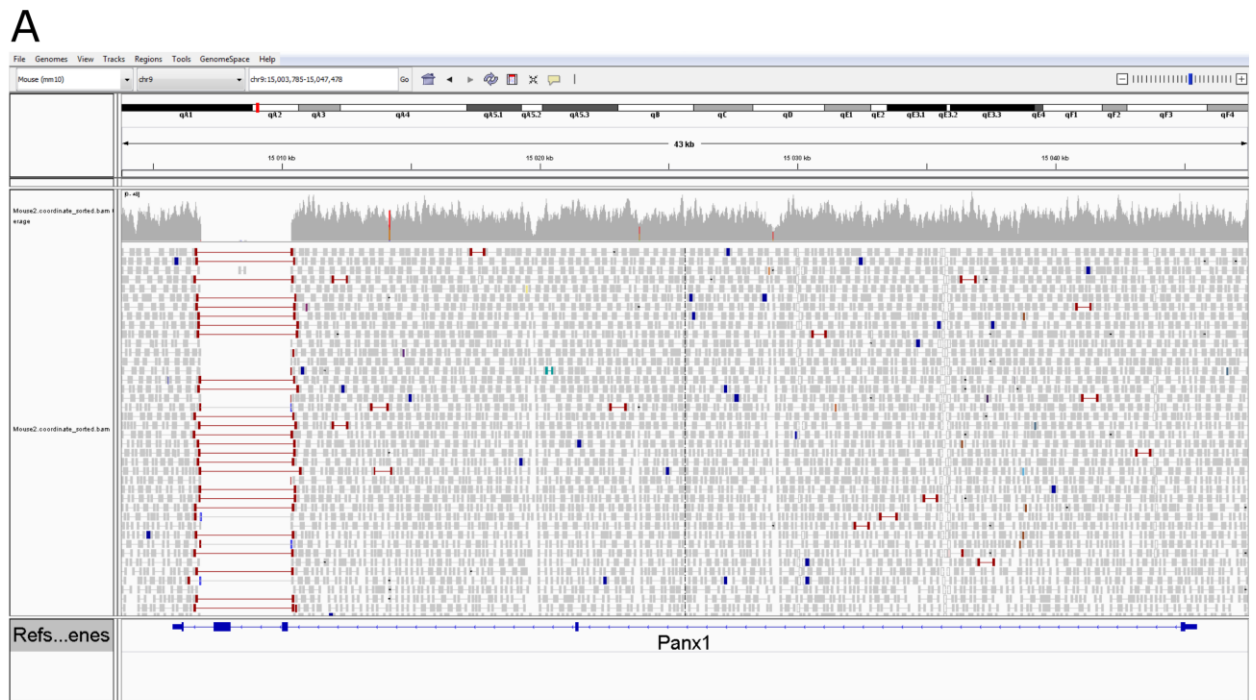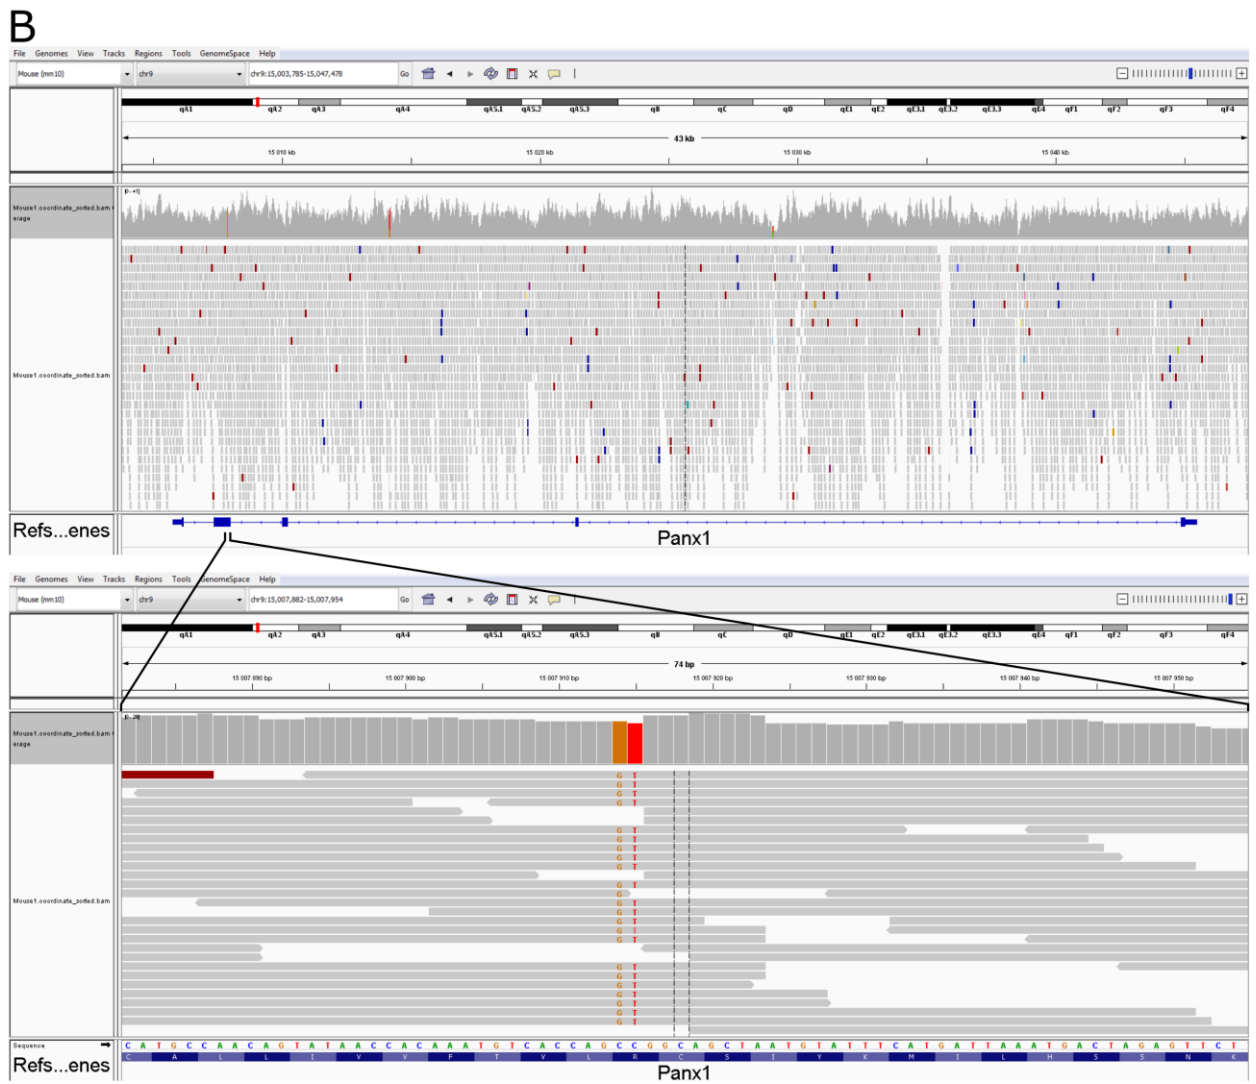

**Figure S1:** The results of whole-genome sequencing for mice from Knockout (A) and Substitution (B) groups.
